# Supplementary material for: Physical Activity and Health Perception in Aging: Do Body Mass and Satisfaction Matter? A Three-Path Mediated Link
Source: PubMed Central journal article supplement (PMC5017576; doi:10.1371/journal.pone.0160805), 2016-09-09

# Università degli Studi di Roma "Foro Italico"

\* Required

## QUESTIONARI

I seguenti questionari sono indirizzati alla valutazione del suo stato di salute, del suo livello di attività fisica, della percezione della sua immagine corporea, del suo comportamento alimentare e della sua attitudine verso l'esercizio fisico. Non esistono risposte corrette o sbagliate. Compili completamente tutti i questionari in maniera accurata ed onesta. Tutte le risposte sono confidenziali.

### 1. Codice identificativo \*

.....

### 2. Data di nascita: \*

(gg/mm/aaaa)

.....

### 3. Sei in pensione? \*

Mark only one oval.

- Si  
 No

### 4. Se hai risposto NO, indica la tua attività lavorativa:

.....  
.....  
.....  
.....  
.....

### 5. Indica il tuo livello di istruzione: \*

Mark only one oval.

- Licenza elementare  
 Licenza media  
 Diploma  
 Laurea  
 Other: .....

### 6. Peso: \*

.....

### 7. Statura: \*

.....

## Stato di salute fisica

---

**8. Elenca i motivi per cui ti sei ricoverato in ospedale negli ultimi 5 anni:**

.....

.....

.....

.....

.....

**9. Elenca le malattie avute recentemente:**

.....

.....

.....

.....

.....

**10. Indica i problemi di salute:**

*Check all that apply.*

- Anemia
- Artrite, borsiti
- Asma
- Pressione alta
- Pressione bassa
- Dolori al petto
- Problemi intestinali
- Problemi vescicali
- Disagio durante esercizio
- Diabete
- Difficoltà a sentire
- Difficoltà a vedere
- Vertigini
- Condizioni del cuore
- Ernia
- Indigestione
- Dolore alle articolazioni
- Dolore delle gambe durante camminata
- Problemi respiratori, respiro corto, fiatone
- Osteoporosi
- Dolori lombari
- Colesterolo alto
- Problemi gastrici
- Altre condizioni

**11. Uso di sigarette: \***

*Mark only one oval.*

- Ho fumato in passato
- Non fumo
- Fumo adesso

**12. Se hai risposto FUMO, indica quante sigarette al giorno:**

.....

**13. Consumo di alcool: \***

*Mark only one oval.*

- No
- Occasionalmente

**14. Se hai risposto OCCASIONALMENTE, indica quanti bicchieri al giorno:**

.....

**15. Elenca problemi relativi al consumo di alcool:**

.....  
.....  
.....  
.....  
.....

**16. Prescrizioni mediche: \***

*Mark only one oval.*

- No
- Si

**17. Se hai risposto SI, indica le prescrizioni mediche:**

(Nome o principio attivo del farmaco e dosaggio)

.....  
.....  
.....  
.....  
.....

**18. Fai uso di integratori? Se si indica quali.**

.....

.....

.....

.....

.....

**Livello di attività fisica**

---

**19. Come valuti il tuo livello di attività fisica nell'ultimo anno? \***

*Mark only one oval.*

- BASSO: stare seduti, piegarsi, guidare, parlare, no esercizio programmato
- MEDIO: stare in piedi, camminare, piegarsi muoversi
- MODERATO: stare in piedi, camminare, piegarsi, muoversi, fare esercizio una volta a settimana
- ATTIVO: lavoro fisico leggero, salire le scale, fare esercizio 2 o 3 giorni a settimana
- MOLTO ATTIVO: lavoro fisico moderato, esercizio regolare 4 o più giorni a settimana

**20. Attività fisica o sport praticato: \***

*Check all that apply.*

- Niente
- Palestra
- Corsa
- Nuoto
- Ciclismo
- Basket
- Calcio
- Golf
- Tennis
- Atletica
- Other: .....

**21. Quante volte ti alleni a settimana? \***

*Mark only one oval.*

- 0
- 1
- 2
- 3
- 4
- 5
- 6
- 7

**22. Quante ore ti alleni a settimana? \****Mark only one oval.*

- 0
- 1 - 2 ore
- 2 -3 ore
- 3 - 6 ore
- più di 6 ore

**23. Quanto dura mediamente una seduta di allenamento? \****Mark only one oval.*

- Non mi alleno
- meno di 1 ora
- 1 - 2 ore
- 2 - 3 ore
- più di 3 ore
- Other: .....

**24. Hai un allenatore che ti segue? \****Mark only one oval.*

- Sì
- No

**25. Che tipo di attività fisica svolgi? \****Mark only one oval.*

- Nessuna attività
- Ricreazionale/amatoriale
- Agonistica (partecipazione a campionati)

**26. Se hai risposto AGONISTICA alla domanda precedente, indica a quante gare partecipi mediamente ogni mese:**

.....

## **BODY IMAGE DIMENSIONAL ASSESSMENT (BIDA)**

---

In riferimento alla figura riportata, rispondi alle seguenti domande utilizzando la scala che oscilla tra i valori 1,8 e 5,2 in merito alla percezione della dimensione corporea. Naturalmente sono consentite risposte intermedie (es. 3,6).

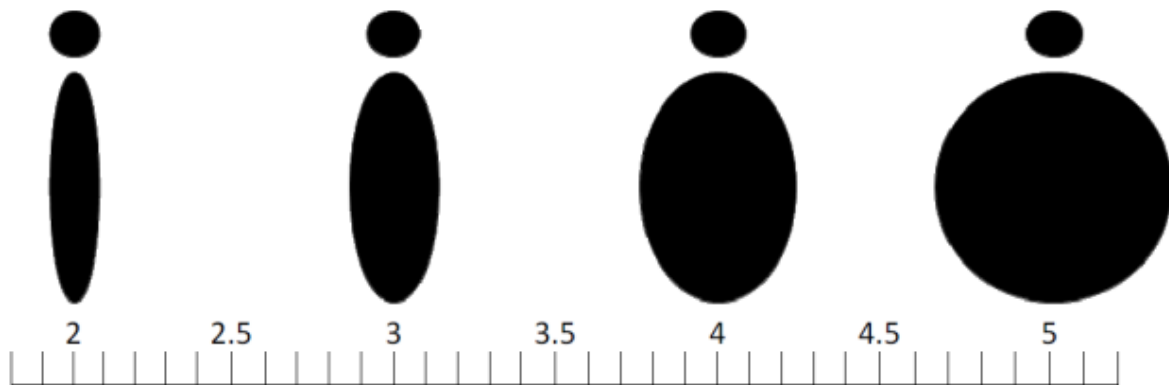

27. Come pensi di essere attualmente? \*

.....

28. Quale è la tua figura ideale? \*

.....

29. Quale figura pensi sia più attraente per l'altro sesso? \*

.....

30. Come sono la maggior parte delle persone del tuo sesso ed età? \*

.....

31. Indica il tuo peso \*

.....

32. Indica la tua statura \*

.....

## EATING ATTITUDES TEST (EAT-26)

Questo questionario permette di determinare la possibilità di avere un disturbo alimentare che necessita di attenzione da parte di un medico. Questo questionario non è progettato per fare una diagnosi di un disturbo alimentare o di prendere il posto di una consulenza medica professionale.

33. Peso attuale \*

.....

34. Peso maggiore \*

(gravidanza esclusa)

.....

35. Peso minore \*

(durante l'età adulta - età superiore ai 25 anni)

.....

**36. Peso ideale \*****37. 1. Ho una terribile paura di ingrassare \***

*Mark only one oval.*

- Sempre
- Molto spesso
- Spesso
- Qualche volta
- Raramente
- Mai

**38. 2. Quando ho fame evito di mangiare \***

*Mark only one oval.*

- Sempre
- Molto spesso
- Spesso
- Qualche volta
- Raramente
- Mai

**39. 3. Penso al cibo con preoccupazione \***

*Mark only one oval.*

- Sempre
- Molto spesso
- Spesso
- Qualche volta
- Raramente
- Mai

**40. 4. Mi è capitato di mangiare con enorme voracità sentendomi incapace di smettere \***

*Mark only one oval.*

- Sempre
- Molto spesso
- Spesso
- Qualche volta
- Raramente
- Mai

**41. 5. Ho l'abitudine di sminuzzare il cibo \****Mark only one oval.*

- Sempre
- Molto spesso
- Spesso
- Qualche volta
- Raramente
- Mai

**42. 6. Faccio molta attenzione al potere calorico dei cibi che mangio \****Mark only one oval.*

- Sempre
- Molto spesso
- Spesso
- Qualche volta
- Raramente
- Mai

**43. 7. Evito in particolare i cibi con elevato contenuto di carboidrati (pane, pasta, dolci) \****Mark only one oval.*

- Sempre
- Molto spesso
- Spesso
- Qualche volta
- Raramente
- Mai

**44. 8. Sento che gli altri vorrebbero che io mangiassi di più \****Mark only one oval.*

- Sempre
- Molto spesso
- Spesso
- Qualche volta
- Raramente
- Mai

**45. 9. Mi capita di vomitare dopo aver mangiato \****Mark only one oval.*

- Sempre
- Molto spesso
- Spesso
- Qualche volta
- Raramente
- Mai



**46. 10. Mi sento molto in colpa dopo mangiato \****Mark only one oval.*

- Sempre
- Molto spesso
- Spesso
- Qualche volta
- Raramente
- Mai

**47. 11. Mi tormenta il desiderio di essere più magro/a \****Mark only one oval.*

- Sempre
- Molto spesso
- Spesso
- Qualche volta
- Raramente
- Mai

**48. 12. Mi sottopongo a esercizi fisici intensi per bruciare calorie \****Mark only one oval.*

- Sempre
- Molto spesso
- Spesso
- Qualche volta
- Raramente
- Mai

**49. 13. Gli altri pensano che sono troppo magro/a \****Mark only one oval.*

- Sempre
- Molto spesso
- Spesso
- Qualche volta
- Raramente
- Mai

**50. 14. Mi preoccupa l'idea di avere del grasso sul corpo \****Mark only one oval.*

- Sempre
- Molto spesso
- Spesso
- Qualche volta
- Raramente
- Mai

**51. 15. Impiego più tempo degli altri per mangiare \****Mark only one oval.*

- Sempre
- Molto spesso
- Spesso
- Qualche volta
- Raramente
- Mai

**52. 16. Evito cibi dolci \****Mark only one oval.*

- Sempre
- Molto spesso
- Spesso
- Qualche volta
- Raramente
- Mai

**53. 17. Mangio cibi dietetici \****Mark only one oval.*

- Sempre
- Molto spesso
- Spesso
- Qualche volta
- Raramente
- Mai

**54. 18. Sento che il cibo domina la mia vita \****Mark only one oval.*

- Sempre
- Molto spesso
- Spesso
- Qualche volta
- Raramente
- Mai

**55. 19. Mi piace mostrare un grande autocontrollo verso il cibo e dominare la fame \****Mark only one oval.*

- Sempre
- Molto spesso
- Spesso
- Qualche volta
- Raramente
- Mai

**56. 20. Sento che gli altri fanno pressioni su di me perché io mangi \****Mark only one oval.*

- Sempre  
 Molto spesso  
 Spesso  
 Qualche volta  
 Raramente  
 Mai

**57. 21. Dedico al cibo troppo tempo e troppi pensieri \****Mark only one oval.*

- Sempre  
 Molto spesso  
 Spesso  
 Qualche volta  
 Raramente  
 Mai

**58. 22. Mi dispero se mangio dei dolci \****Mark only one oval.*

- Sempre  
 Molto spesso  
 Spesso  
 Qualche volta  
 Raramente  
 Mai

**59. 23. Mi impegno in programmi di dieta \****Mark only one oval.*

- Sempre  
 Molto spesso  
 Spesso  
 Qualche volta  
 Raramente  
 Mai

**60. 24. Mi piace che il mio stomaco sia vuoto \****Mark only one oval.*

- Sempre  
 Molto spesso  
 Spesso  
 Qualche volta  
 Raramente  
 Mai

**61. 25. Ho l'impulso di vomitare dopo mangiato \****Mark only one oval.*

- Sempre
- Molto spesso
- Spesso
- Qualche volta
- Raramente
- Mai

**62. 26. Mi piace provare nuovi cibi elaborati \****Mark only one oval.*

- Sempre
- Molto spesso
- Spesso
- Qualche volta
- Raramente
- Mai

**EXERCISE DEPENDENCE SCALE-21**

Usando una scala da 1 (mai) a 6 (sempre), si prega di completare le seguenti domande nel modo più onesto possibile. Le domande si riferiscono ai pensieri ed i comportamenti avuti negli ultimi 3 mesi riguardanti l'esercizio fisico. Non ci sono risposte giuste o sbagliate. Tutte le risposte sono confidenziali.

**63. 1. Mi esercito per evitare di essere irritabile \****Mark only one oval.*

|     |                       |                       |                       |                       |                       |                       |        |
|-----|-----------------------|-----------------------|-----------------------|-----------------------|-----------------------|-----------------------|--------|
|     | 1                     | 2                     | 3                     | 4                     | 5                     | 6                     |        |
| Mai | <input type="radio"/> | <input type="radio"/> | <input type="radio"/> | <input type="radio"/> | <input type="radio"/> | <input type="radio"/> | Sempre |

**64. 2. Mi esercito nonostante abbia problemi fisici ricorrenti \****Mark only one oval.*

|     |                       |                       |                       |                       |                       |                       |        |
|-----|-----------------------|-----------------------|-----------------------|-----------------------|-----------------------|-----------------------|--------|
|     | 1                     | 2                     | 3                     | 4                     | 5                     | 6                     |        |
| Mai | <input type="radio"/> | <input type="radio"/> | <input type="radio"/> | <input type="radio"/> | <input type="radio"/> | <input type="radio"/> | Sempre |

**65. 3. Aumento costantemente l'intensità della mia attività fisica per raggiungere gli effetti/benefici desiderati \****Mark only one oval.*

|     |                       |                       |                       |                       |                       |                       |        |
|-----|-----------------------|-----------------------|-----------------------|-----------------------|-----------------------|-----------------------|--------|
|     | 1                     | 2                     | 3                     | 4                     | 5                     | 6                     |        |
| Mai | <input type="radio"/> | <input type="radio"/> | <input type="radio"/> | <input type="radio"/> | <input type="radio"/> | <input type="radio"/> | Sempre |

**66. 4. Non riesco a ridurre la durata della mia attività fisica \****Mark only one oval.*

|     | 1                     | 2                     | 3                     | 4                     | 5                     | 6                     |        |
|-----|-----------------------|-----------------------|-----------------------|-----------------------|-----------------------|-----------------------|--------|
| Mai | <input type="radio"/> | <input type="radio"/> | <input type="radio"/> | <input type="radio"/> | <input type="radio"/> | <input type="radio"/> | Sempre |

**67. 5. Vorrei esercitarmi piuttosto che trascorrere del tempo con la famiglia/gli amici \****Mark only one oval.*

|     | 1                     | 2                     | 3                     | 4                     | 5                     | 6                     |        |
|-----|-----------------------|-----------------------|-----------------------|-----------------------|-----------------------|-----------------------|--------|
| Mai | <input type="radio"/> | <input type="radio"/> | <input type="radio"/> | <input type="radio"/> | <input type="radio"/> | <input type="radio"/> | Sempre |

**68. 6. Passo molto tempo facendo attività fisica \****Mark only one oval.*

|     | 1                     | 2                     | 3                     | 4                     | 5                     | 6                     |        |
|-----|-----------------------|-----------------------|-----------------------|-----------------------|-----------------------|-----------------------|--------|
| Mai | <input type="radio"/> | <input type="radio"/> | <input type="radio"/> | <input type="radio"/> | <input type="radio"/> | <input type="radio"/> | Sempre |

**69. 7. Faccio attività fisica più a lungo di quanto voglio \****Mark only one oval.*

|     | 1                     | 2                     | 3                     | 4                     | 5                     | 6                     |        |
|-----|-----------------------|-----------------------|-----------------------|-----------------------|-----------------------|-----------------------|--------|
| Mai | <input type="radio"/> | <input type="radio"/> | <input type="radio"/> | <input type="radio"/> | <input type="radio"/> | <input type="radio"/> | Sempre |

**70. 8. Mi esercito per evitare di sentirmi ansioso \****Mark only one oval.*

|     | 1                     | 2                     | 3                     | 4                     | 5                     | 6                     |        |
|-----|-----------------------|-----------------------|-----------------------|-----------------------|-----------------------|-----------------------|--------|
| Mai | <input type="radio"/> | <input type="radio"/> | <input type="radio"/> | <input type="radio"/> | <input type="radio"/> | <input type="radio"/> | Sempre |

**71. 9. Mi esercito quando sono infortunato \****Mark only one oval.*

|     | 1                     | 2                     | 3                     | 4                     | 5                     | 6                     |        |
|-----|-----------------------|-----------------------|-----------------------|-----------------------|-----------------------|-----------------------|--------|
| Mai | <input type="radio"/> | <input type="radio"/> | <input type="radio"/> | <input type="radio"/> | <input type="radio"/> | <input type="radio"/> | Sempre |

**72. 10. Incremento costantemente la frequenza della mia attività fisica per raggiungere gli effetti/benefici desiderati \****Mark only one oval.*

|     | 1                     | 2                     | 3                     | 4                     | 5                     | 6                     |        |
|-----|-----------------------|-----------------------|-----------------------|-----------------------|-----------------------|-----------------------|--------|
| Mai | <input type="radio"/> | <input type="radio"/> | <input type="radio"/> | <input type="radio"/> | <input type="radio"/> | <input type="radio"/> | Sempre |

73. **11. Sono incapace di ridurre la frequenza della mia attività fisica \****Mark only one oval.*

|     | 1                     | 2                     | 3                     | 4                     | 5                     | 6                     |        |
|-----|-----------------------|-----------------------|-----------------------|-----------------------|-----------------------|-----------------------|--------|
| Mai | <input type="radio"/> | <input type="radio"/> | <input type="radio"/> | <input type="radio"/> | <input type="radio"/> | <input type="radio"/> | Sempre |

74. **12. Penso all'esercizio fisico quando dovrei essere concentrato sulla scuola/sul lavoro \****Mark only one oval.*

|     | 1                     | 2                     | 3                     | 4                     | 5                     | 6                     |        |
|-----|-----------------------|-----------------------|-----------------------|-----------------------|-----------------------|-----------------------|--------|
| Mai | <input type="radio"/> | <input type="radio"/> | <input type="radio"/> | <input type="radio"/> | <input type="radio"/> | <input type="radio"/> | Sempre |

75. **13. Passo la maggior parte del mio tempo libero facendo esercizio fisico \****Mark only one oval.*

|     | 1                     | 2                     | 3                     | 4                     | 5                     | 6                     |        |
|-----|-----------------------|-----------------------|-----------------------|-----------------------|-----------------------|-----------------------|--------|
| Mai | <input type="radio"/> | <input type="radio"/> | <input type="radio"/> | <input type="radio"/> | <input type="radio"/> | <input type="radio"/> | Sempre |

76. **14. Mi esercito di più di quanto aspettavo \****Mark only one oval.*

|     | 1                     | 2                     | 3                     | 4                     | 5                     | 6                     |        |
|-----|-----------------------|-----------------------|-----------------------|-----------------------|-----------------------|-----------------------|--------|
| Mai | <input type="radio"/> | <input type="radio"/> | <input type="radio"/> | <input type="radio"/> | <input type="radio"/> | <input type="radio"/> | Sempre |

77. **15. Mi esercito per evitare di sentirmi teso \****Mark only one oval.*

|     | 1                     | 2                     | 3                     | 4                     | 5                     | 6                     |        |
|-----|-----------------------|-----------------------|-----------------------|-----------------------|-----------------------|-----------------------|--------|
| Mai | <input type="radio"/> | <input type="radio"/> | <input type="radio"/> | <input type="radio"/> | <input type="radio"/> | <input type="radio"/> | Sempre |

78. **16. Mi esercito nonostante i miei persistenti problemi fisici \****Mark only one oval.*

|     | 1                     | 2                     | 3                     | 4                     | 5                     | 6                     |        |
|-----|-----------------------|-----------------------|-----------------------|-----------------------|-----------------------|-----------------------|--------|
| Mai | <input type="radio"/> | <input type="radio"/> | <input type="radio"/> | <input type="radio"/> | <input type="radio"/> | <input type="radio"/> | Sempre |

79. **17. Aumento costantemente la durata della mia attività fisica per raggiungere gli effetti/benefici desiderati \****Mark only one oval.*

|     | 1                     | 2                     | 3                     | 4                     | 5                     | 6                     |        |
|-----|-----------------------|-----------------------|-----------------------|-----------------------|-----------------------|-----------------------|--------|
| Mai | <input type="radio"/> | <input type="radio"/> | <input type="radio"/> | <input type="radio"/> | <input type="radio"/> | <input type="radio"/> | Sempre |

**80. 18. Sono incapace di ridurre l'intensità della mia attività fisica \****Mark only one oval.*

|     | 1                     | 2                     | 3                     | 4                     | 5                     | 6                     |        |
|-----|-----------------------|-----------------------|-----------------------|-----------------------|-----------------------|-----------------------|--------|
| Mai | <input type="radio"/> | <input type="radio"/> | <input type="radio"/> | <input type="radio"/> | <input type="radio"/> | <input type="radio"/> | Sempre |

**81. 19. Scelgo di esercitarmi per evitare di perdere tempo con famiglia/amici \****Mark only one oval.*

|     | 1                     | 2                     | 3                     | 4                     | 5                     | 6                     |        |
|-----|-----------------------|-----------------------|-----------------------|-----------------------|-----------------------|-----------------------|--------|
| Mai | <input type="radio"/> | <input type="radio"/> | <input type="radio"/> | <input type="radio"/> | <input type="radio"/> | <input type="radio"/> | Sempre |

**82. 20. Una buona parte del mio tempo la passo ad esercitarmi \****Mark only one oval.*

|     | 1                     | 2                     | 3                     | 4                     | 5                     | 6                     |        |
|-----|-----------------------|-----------------------|-----------------------|-----------------------|-----------------------|-----------------------|--------|
| Mai | <input type="radio"/> | <input type="radio"/> | <input type="radio"/> | <input type="radio"/> | <input type="radio"/> | <input type="radio"/> | Sempre |

**83. 21. Mi esercito più di quanto pianifico \****Mark only one oval.*

|     | 1                     | 2                     | 3                     | 4                     | 5                     | 6                     |        |
|-----|-----------------------|-----------------------|-----------------------|-----------------------|-----------------------|-----------------------|--------|
| Mai | <input type="radio"/> | <input type="radio"/> | <input type="radio"/> | <input type="radio"/> | <input type="radio"/> | <input type="radio"/> | Sempre |

Powered by

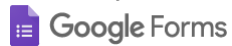

Supplement: pone.0160805.s003.pdf [file pone.0160805.s003.pdf]
