# Supplementary material for: Physical Activity and Health Perception in Aging: Do Body Mass and Satisfaction Matter? A Three-Path Mediated Link
Source: PubMed Central journal article supplement (PMC5017576; doi:10.1371/journal.pone.0160805), 2016-09-09
Supplement: pone.0160805.s002.pdf [file pone.0160805.s002.pdf]

# Università degli Studi di Roma "Foro Italico"

\* Required

## QUESTIONNAIRES

The following questionnaires evaluate your health status, physical activity level, perception of body image, eating behavior, exercise attitude. There are no right or wrong answers. Fill out all the questionnaires carefully and honestly. All answers are confidential.

### 1. Identification code \*

---

### 2. Birthday: \*

(dd/mm/yyyy)

---

### 3. Are you in retirement? \*

Yes

No

### 4. If you answered NO, indicate your job:

---

### 5. Indicate your educational level: \*

Primary school

Middle school

High school

Bachelor

Master

Other \_\_\_\_\_

### 6. Body mass: \*

---

**7. Height: \***

---

**Physical health status**

---

**8. List the reasons why you are hospitalized in the past 5 years:**

---

---

---

**9. List the diseases recently had:**

---

---

---

**10. Indicate the health problems:**

- Anemia
- Arthritis, bursitis
- Asthma
- High pressure
- Low pressure
- Chest pains
- Intestinal problems
- Bladder problems
- Discomfort during exercise
- Diabetes
- Difficulty hearing
- Difficulty seeing
- Dizziness
- Heart conditions

- Hernia
- Indigestion
- Joint pain
- Leg pain during walking
- Respiratory problems, shortness of breath
- Osteoporosis
- Lower back pain
- High cholesterol
- Gastric problems
- Other conditions

**11. Smoking status: \***

- I have smoked in past
- I do not smoke
- I smoke now

12. If you answered I smoke now, indicate how many cigarettes per day

---

**13. Alcohol consumption: \***

- Never
- Occasionally

14. If you answered Occasionally, indicate how many glasses per day

---

15. List health problems due to alcohol consumption:

---

---

---

16. Medical prescriptions: \*

No

Yes

17. If you answered Yes, indicate the medical prescriptions (name and dose):

---

---

---

18. Do you use supplements? List them: \*

---

---

---

## Physical activity level

---

19. How do you evaluate your physical activity level during the last year? \*

LOW: sitting, bending, driving, talking, no pre-planned exercise

MEDIUM: standing, walking, bending, moving

MODERATE: standing, walking, bending, moving, exercise once per week

ACTIVE: light exercise, stairs climbing, exercise 2-3 times per week

VERY ACTIVE: moderate exercise, regular exercise 4 times per week or more

20. Physical activity or sport practiced: \*

Nothing

Gym

Running

- Swimming
- Cycling
- Basket
- Soccer
- Golf
- Tennis
- Track and field
- Other: \_\_\_\_\_

**21. How many times per week do you exercise? \***

- 0
- 1
- 2
- 3
- 4
- 5
- 6
- 7

**22. How many hours per week do you exercise? \***

- 0
- 1 – 2 hours
- 2 – 3 hours
- 3 – 6 hours

More than 6 hours

**23. How long does each session take? \***

No exercise

Less than 1 hour

1 – 2 hours

2 – 3 hours

More than 3 hours

Other: \_\_\_\_\_

**24. Do you have a trainer? \***

Yes

No

**25. Which kind of activity do you practice? \***

No activity

Recreational/amateur activity

Competitive activity

**26. If you answered Competitive activity, indicate how many competitions per month:**

\_\_\_\_\_

## BODY IMAGE DIMENSIONAL ASSESSMENT (BIDA)

Referring to the figure below, answer to the following questions using a scale from 1.8 to 5.2 for the perception of body image dimension. Intermediate values are allowed (e.g., 3.6).

**Body Image Dimensional Assessment (BIDA)**

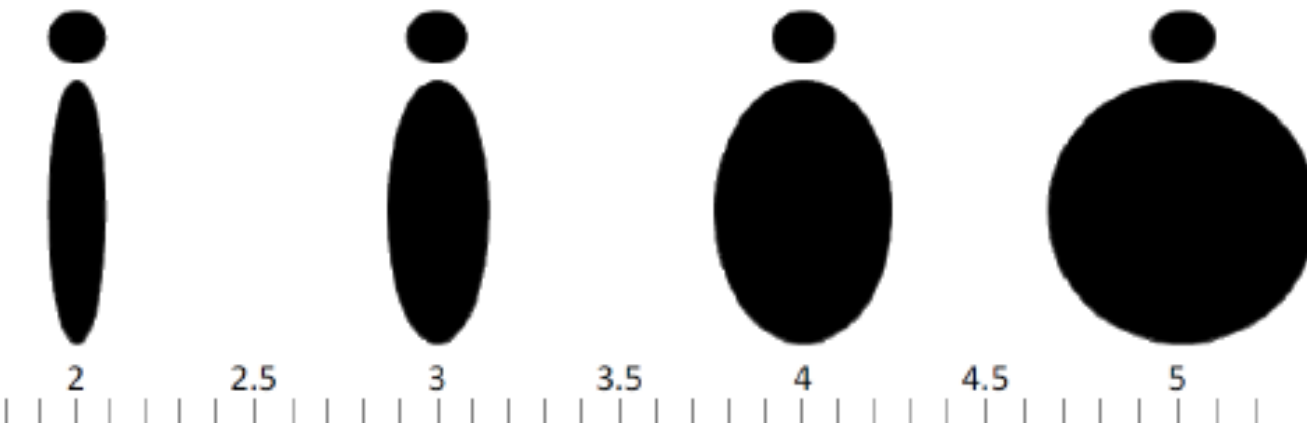

1. What do you think you look like currently?  
*Answer* \_\_\_\_\_

2. Which is your ideal figure?  
*Answer* \_\_\_\_\_

3. Which is the most attractive figure for the opposite sex?  
*Answer* \_\_\_\_\_

4. How do most people with your own sex and age look like?  
*Answer* \_\_\_\_\_

Could you indicate your weight and your height?

Weight \_\_\_\_\_ Height \_\_\_\_\_

Age \_\_\_\_\_ Gender \_\_\_\_\_

(For the interviewer: Weight \_\_\_\_\_ Height \_\_\_\_\_)

# EATING ATTITUDES TEST (EAT26)

## Eating Attitudes Test (EAT-26)<sup>®</sup>

Instructions: This is a screening measure to help you determine whether you might have an eating disorder that needs professional attention. This screening measure is not designed to make a diagnosis of an eating disorder or take the place of a professional consultation. Please fill out the below form as accurately, honestly and completely as possible. There are no right or wrong answers. All of your responses are confidential.

### Part A: Complete the following questions:

|                           |                                          |         |       |            |                          |                          |
|---------------------------|------------------------------------------|---------|-------|------------|--------------------------|--------------------------|
| 1) Birth Date             | Month:                                   | Day:    | Year: | 2) Gender: | Male                     | Female                   |
| 3) Height                 | Feet :                                   | Inches: |       |            | <input type="checkbox"/> | <input type="checkbox"/> |
| 4) Current Weight (lbs.): | 5) Highest Weight (excluding pregnancy): |         |       |            |                          |                          |
| 6) Lowest Adult Weight:   | 7) Ideal Weight:                         |         |       |            |                          |                          |

### Part B: Check a response for each of the following statements:

|                                                                                                | Always                   | Usually                  | Often                    | Some times               | Rarely                   | Never                    |
|------------------------------------------------------------------------------------------------|--------------------------|--------------------------|--------------------------|--------------------------|--------------------------|--------------------------|
| 1. Am terrified about being overweight.                                                        | <input type="checkbox"/> | <input type="checkbox"/> | <input type="checkbox"/> | <input type="checkbox"/> | <input type="checkbox"/> | <input type="checkbox"/> |
| 2. Avoid eating when I am hungry.                                                              | <input type="checkbox"/> | <input type="checkbox"/> | <input type="checkbox"/> | <input type="checkbox"/> | <input type="checkbox"/> | <input type="checkbox"/> |
| 3. Find myself preoccupied with food.                                                          | <input type="checkbox"/> | <input type="checkbox"/> | <input type="checkbox"/> | <input type="checkbox"/> | <input type="checkbox"/> | <input type="checkbox"/> |
| 4. Have gone on eating binges where I feel that I may not be able to stop.                     | <input type="checkbox"/> | <input type="checkbox"/> | <input type="checkbox"/> | <input type="checkbox"/> | <input type="checkbox"/> | <input type="checkbox"/> |
| 5. Cut my food into small pieces.                                                              | <input type="checkbox"/> | <input type="checkbox"/> | <input type="checkbox"/> | <input type="checkbox"/> | <input type="checkbox"/> | <input type="checkbox"/> |
| 6. Aware of the calorie content of foods that I eat.                                           | <input type="checkbox"/> | <input type="checkbox"/> | <input type="checkbox"/> | <input type="checkbox"/> | <input type="checkbox"/> | <input type="checkbox"/> |
| 7. Particularly avoid food with a high carbohydrate content (i.e. bread, rice, potatoes, etc.) | <input type="checkbox"/> | <input type="checkbox"/> | <input type="checkbox"/> | <input type="checkbox"/> | <input type="checkbox"/> | <input type="checkbox"/> |
| 8. Feel that others would prefer if I ate more.                                                | <input type="checkbox"/> | <input type="checkbox"/> | <input type="checkbox"/> | <input type="checkbox"/> | <input type="checkbox"/> | <input type="checkbox"/> |
| 9. Vomit after I have eaten.                                                                   | <input type="checkbox"/> | <input type="checkbox"/> | <input type="checkbox"/> | <input type="checkbox"/> | <input type="checkbox"/> | <input type="checkbox"/> |
| 10. Feel extremely guilty after eating.                                                        | <input type="checkbox"/> | <input type="checkbox"/> | <input type="checkbox"/> | <input type="checkbox"/> | <input type="checkbox"/> | <input type="checkbox"/> |
| 11. Am preoccupied with a desire to be thinner.                                                | <input type="checkbox"/> | <input type="checkbox"/> | <input type="checkbox"/> | <input type="checkbox"/> | <input type="checkbox"/> | <input type="checkbox"/> |
| 12. Think about burning up calories when I exercise.                                           | <input type="checkbox"/> | <input type="checkbox"/> | <input type="checkbox"/> | <input type="checkbox"/> | <input type="checkbox"/> | <input type="checkbox"/> |
| 13. Other people think that I am too thin.                                                     | <input type="checkbox"/> | <input type="checkbox"/> | <input type="checkbox"/> | <input type="checkbox"/> | <input type="checkbox"/> | <input type="checkbox"/> |
| 14. Am preoccupied with the thought of having fat on my body.                                  | <input type="checkbox"/> | <input type="checkbox"/> | <input type="checkbox"/> | <input type="checkbox"/> | <input type="checkbox"/> | <input type="checkbox"/> |
| 15. Take longer than others to eat my meals.                                                   | <input type="checkbox"/> | <input type="checkbox"/> | <input type="checkbox"/> | <input type="checkbox"/> | <input type="checkbox"/> | <input type="checkbox"/> |
| 16. Avoid foods with sugar in them.                                                            | <input type="checkbox"/> | <input type="checkbox"/> | <input type="checkbox"/> | <input type="checkbox"/> | <input type="checkbox"/> | <input type="checkbox"/> |
| 17. Eat diet foods.                                                                            | <input type="checkbox"/> | <input type="checkbox"/> | <input type="checkbox"/> | <input type="checkbox"/> | <input type="checkbox"/> | <input type="checkbox"/> |
| 18. Feel that food controls my life.                                                           | <input type="checkbox"/> | <input type="checkbox"/> | <input type="checkbox"/> | <input type="checkbox"/> | <input type="checkbox"/> | <input type="checkbox"/> |
| 19. Display self-control around food.                                                          | <input type="checkbox"/> | <input type="checkbox"/> | <input type="checkbox"/> | <input type="checkbox"/> | <input type="checkbox"/> | <input type="checkbox"/> |
| 20. Feel that others pressure me to eat.                                                       | <input type="checkbox"/> | <input type="checkbox"/> | <input type="checkbox"/> | <input type="checkbox"/> | <input type="checkbox"/> | <input type="checkbox"/> |
| 21. Give too much time and thought to food.                                                    | <input type="checkbox"/> | <input type="checkbox"/> | <input type="checkbox"/> | <input type="checkbox"/> | <input type="checkbox"/> | <input type="checkbox"/> |
| 22. Feel uncomfortable after eating sweets.                                                    | <input type="checkbox"/> | <input type="checkbox"/> | <input type="checkbox"/> | <input type="checkbox"/> | <input type="checkbox"/> | <input type="checkbox"/> |
| 23. Engage in dieting behavior.                                                                | <input type="checkbox"/> | <input type="checkbox"/> | <input type="checkbox"/> | <input type="checkbox"/> | <input type="checkbox"/> | <input type="checkbox"/> |
| 24. Like my stomach to be empty.                                                               | <input type="checkbox"/> | <input type="checkbox"/> | <input type="checkbox"/> | <input type="checkbox"/> | <input type="checkbox"/> | <input type="checkbox"/> |
| 25. Have the impulse to vomit after meals.                                                     | <input type="checkbox"/> | <input type="checkbox"/> | <input type="checkbox"/> | <input type="checkbox"/> | <input type="checkbox"/> | <input type="checkbox"/> |
| 26. Enjoy trying new rich foods.                                                               | <input type="checkbox"/> | <input type="checkbox"/> | <input type="checkbox"/> | <input type="checkbox"/> | <input type="checkbox"/> | <input type="checkbox"/> |

### Part C: Behavioral Questions:

In the past 6 months have you:

|                                                                                                | Never                        | Once a month or less     | 2-3 times a month           | Once a week              | 2-6 times a week         | Once a day or more       |
|------------------------------------------------------------------------------------------------|------------------------------|--------------------------|-----------------------------|--------------------------|--------------------------|--------------------------|
| A. Gone on eating binges where you feel that you may not be able to stop? *                    | <input type="checkbox"/>     | <input type="checkbox"/> | <input type="checkbox"/>    | <input type="checkbox"/> | <input type="checkbox"/> | <input type="checkbox"/> |
| B. Ever made yourself sick (vomited) to control your weight or shape?                          | <input type="checkbox"/>     | <input type="checkbox"/> | <input type="checkbox"/>    | <input type="checkbox"/> | <input type="checkbox"/> | <input type="checkbox"/> |
| C. Ever used laxatives, diet pills or diuretics (water pills) to control your weight or shape? | <input type="checkbox"/>     | <input type="checkbox"/> | <input type="checkbox"/>    | <input type="checkbox"/> | <input type="checkbox"/> | <input type="checkbox"/> |
| D. Exercised more than 60 minutes a day to lose or to control your weight?                     | <input type="checkbox"/>     | <input type="checkbox"/> | <input type="checkbox"/>    | <input type="checkbox"/> | <input type="checkbox"/> | <input type="checkbox"/> |
| E. Lost 20 pounds or more in the past 6 months                                                 | Yes <input type="checkbox"/> |                          | No <input type="checkbox"/> |                          |                          |                          |

\* Defined as eating much more than most people would under the same circumstances and feeling that eating is out of control
